# Supplementary material
Source: MDPI journal article supplement (https://www.mdpi.com/1424-2818/8/4/24)
Supplement: s1 [file s1]

# Supplementary Materials: Using Long-Term Removal Data to Manage a Crown-of-Thorns Starfish Population

Masako Nakamura, Yoshimi Higa, Naoki H. Kumagai and Ken Okaji

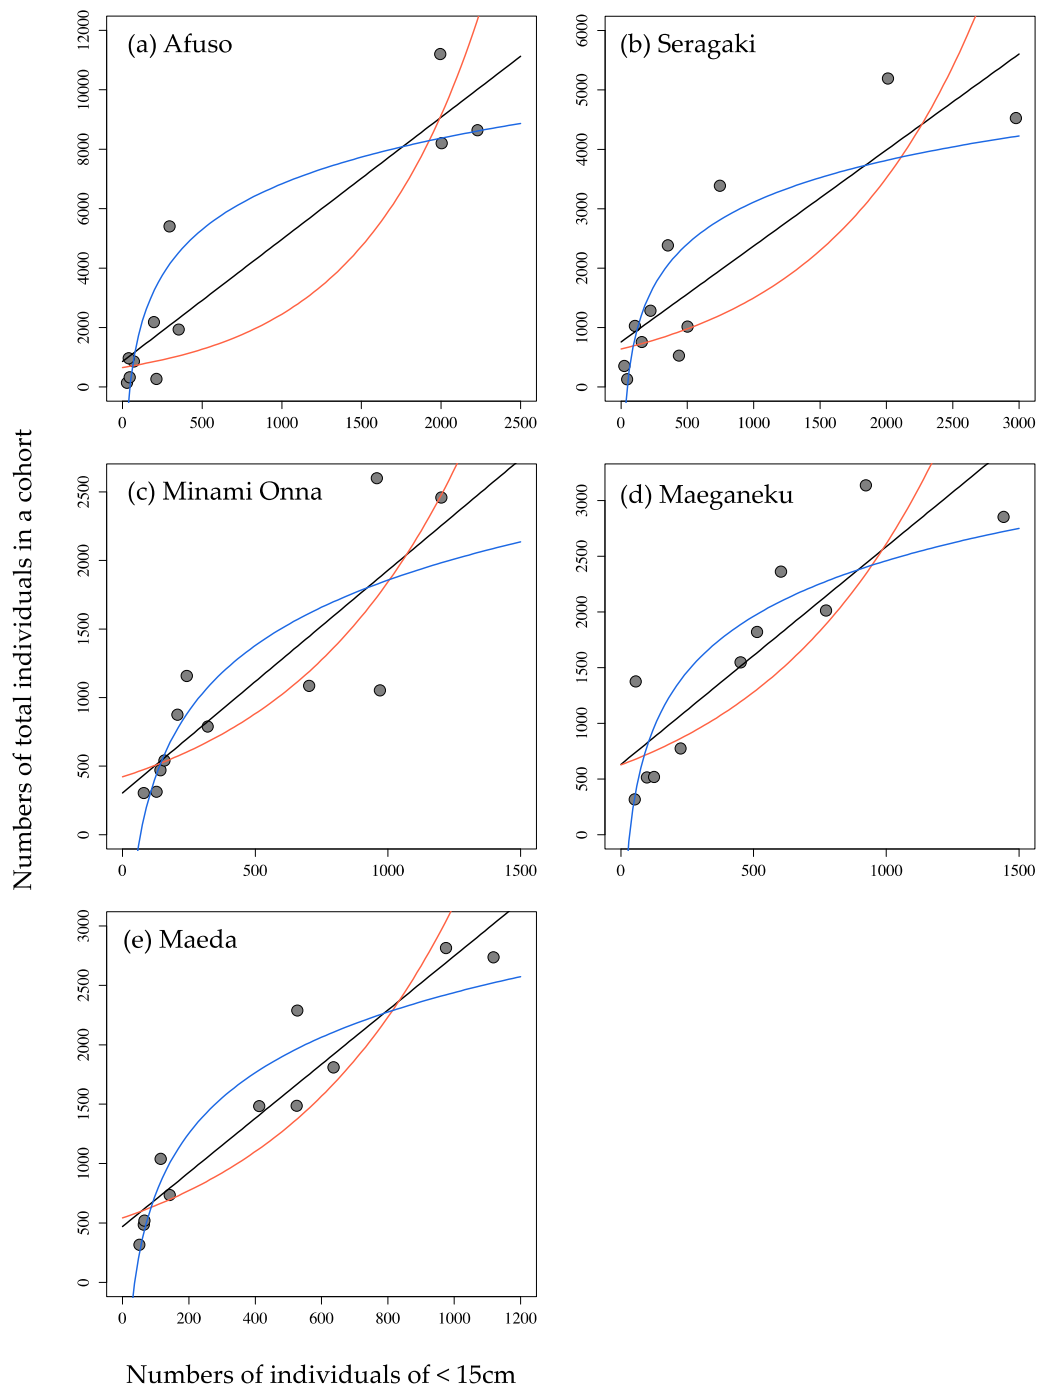

**Figure S1.** Relationship between the numbers of removed individuals <15 cm and of total removed individuals in the same cohort of *Acanthaster cf. solaris* for five sectors along the Onna coast, Okinawa, Japan, with three different models. Black line, linear model; blue line, logarithmic model; red line, exponential model. (a) Afuso; (b) Seragaki; (c) Minami Onna; (d) Maeganeku; (e) Maeda.

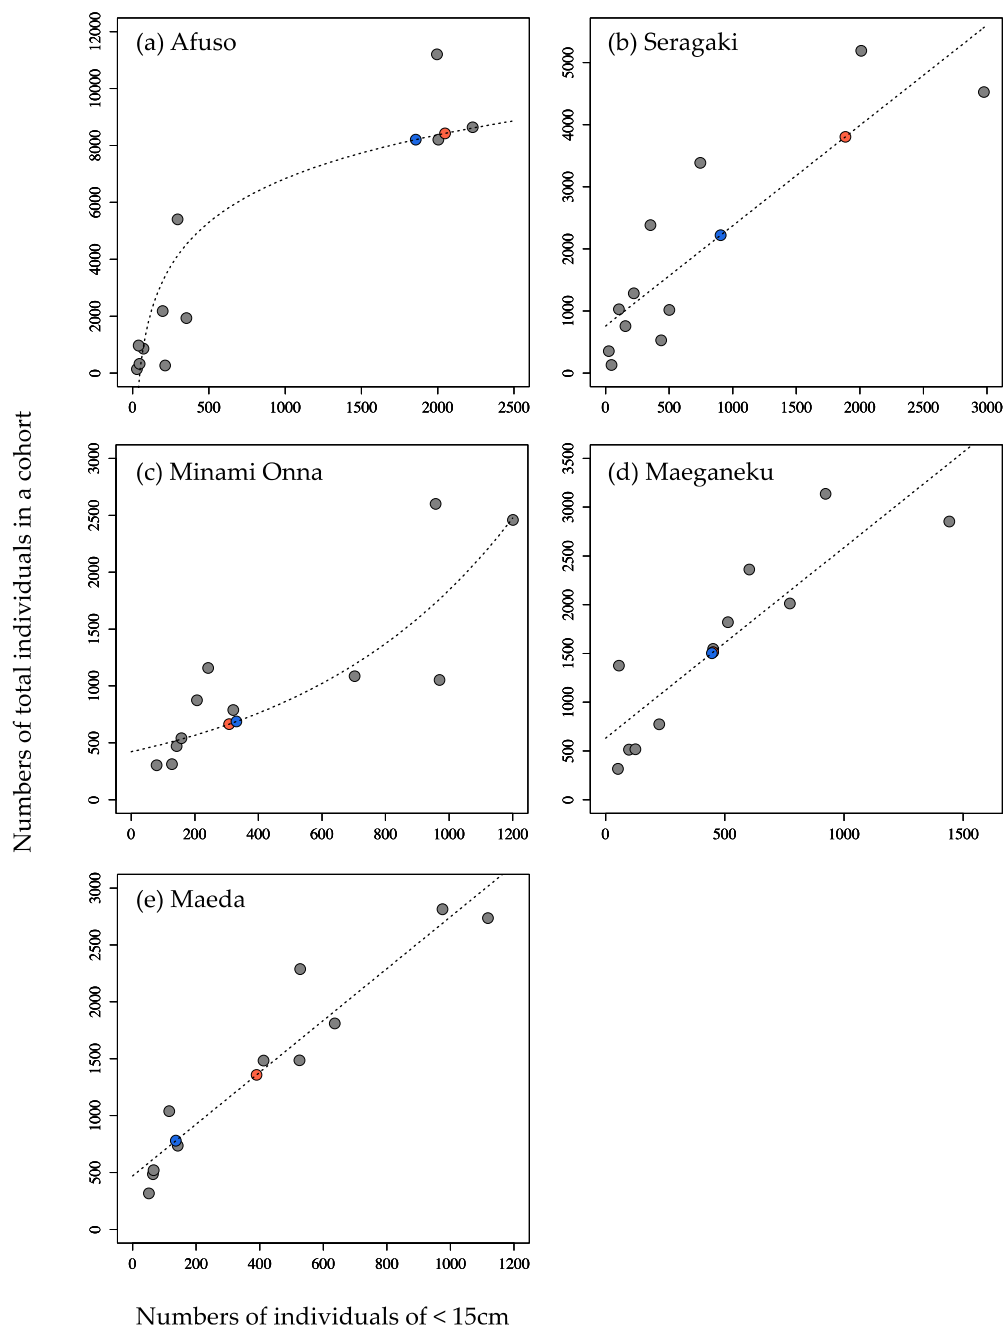

**Figure S2.** Total removable individuals of cohort 2013 (Red) and 2014 (Blue) predicted from the best-fit models for the relationship between the numbers of individuals of <15 cm and total individuals in the same cohort of *Acanthaster cf. solaris* for five sectors along the Onna coast, Okinawa, Japan with observed values (Grey). (a) Afuso; (b) Seragaki; (c) Minami Onna; (d) Maeganeku; (e) Maeda.
